# Supplementary material for: Has Data Quality of an Antimicrobial Resistance Surveillance System in a Province of Nepal Improved between 2019 and 2022?
Source: MDPI journal article supplement (doi:10.3390/tropicalmed8080399), 2023-08-04
Supplement: s1 [file s1]

**Table S1.** Priority specimens and pathogens for surveillance of AMR<sup>1</sup> according to GLASS<sup>2</sup> criteria for Nepal

| Specimen      | Priority pathogens for surveillance                                                                                                                                      |
|---------------|--------------------------------------------------------------------------------------------------------------------------------------------------------------------------|
|               | <i>Escherichia coli</i>                                                                                                                                                  |
| Blood         | <i>Klebsiella pneumoniae</i><br><i>Acinetobacter baumannii</i><br><i>Staphylococcus aureus</i><br><i>Streptococcus pneumoniae</i><br><i>Salmonella</i> spp. <sup>3</sup> |
| Urine         | <i>Escherichia coli</i><br><i>Klebsiella pneumoniae</i>                                                                                                                  |
| Stool         | <i>Salmonella</i> spp.<br><i>Shigella</i> spp.                                                                                                                           |
| Genital swabs | <i>Neisseria gonorrhoeae</i>                                                                                                                                             |

<sup>1</sup>AMR, antimicrobial resistance; <sup>2</sup>GLASS, Global Antimicrobial Resistance Surveillance System; <sup>3</sup>spp., species

**Table S2.** Pathogen–antibacterial combinations on which GLASS<sup>1</sup> gathers data

| Pathogen                               | Antibacterial agents that may be used for AST <sup>2</sup>                                                                                                                         |
|----------------------------------------|------------------------------------------------------------------------------------------------------------------------------------------------------------------------------------|
| <i>Escherichia coli</i>                | Ampicillin<br>Co-trimoxazole<br>Ciprofloxacin or levofloxacin<br>Ceftriaxone or cefotaxime and ceftazidime<br>Cefepime<br>Imipenem, meropenem, ertapenem, or doripenem<br>Colistin |
| <i>Klebsiella pneumoniae</i>           | Co-trimoxazole<br>Ciprofloxacin or levofloxacin<br>Ceftriaxone or cefotaxime and ceftazidime,<br>Cefepime<br>Imipenem, meropenem, ertapenem, or doripenem<br>Colistin              |
| <i>Acinetobacter</i> spp. <sup>3</sup> | Tigecycline or minocycline<br>Gentamicin and amikacin<br>Imipenem, meropenem, or doripenem<br>Colistin                                                                             |
| <i>Streptococcus pneumoniae</i>        | Penicillin G<br>Co-trimoxazole Ceftriaxone or cefotaxime<br>Ciprofloxacin or Levofloxacin                                                                                          |
| <i>Salmonella</i> spp. <sup>3</sup>    | Ceftriaxone or Cefotaxime and Ceftazidime<br>Imipenem, Meropenem, Ertapenem, or Doripenem                                                                                          |
| <i>Shigella</i> spp. <sup>3</sup>      | Ciprofloxacin or levofloxacin<br>Ceftriaxone or cefotaxime and ceftazidime<br>Azithromycin                                                                                         |
| <i>Neisseria gonorrhoeae</i>           | Cefixime<br>Ceftriaxone<br>Azithromycin<br>Spectinomycin<br>Ciprofloxacin<br>Gentamicin                                                                                            |

<sup>1</sup>GLASS, Global Antimicrobial Resistance Surveillance System; <sup>2</sup>AST: antibiotic susceptibility test- ing; <sup>3</sup>spp., species

**Table S3.** Operational definitions

| Terminology                            | Operational definition                                                                                                                                                                                                                                                                                   |
|----------------------------------------|----------------------------------------------------------------------------------------------------------------------------------------------------------------------------------------------------------------------------------------------------------------------------------------------------------|
| AMR data                               | AMR data is defined as the detailed identification and antibiotic susceptibility report along with unique identifiers, specimen, origin, date of sampling and demographic data from surveillance sites' microbiology laboratory records.                                                                 |
| Deadline for report submission to NPHL | For a particular month, the deadline for submission of surveillance reports by the surveillance site to NPHL is the last working day of the following month.                                                                                                                                             |
| Timeliness of report submission        | Report of AMR surveillance, for a particular month, received within deadline for submission, i.e., last working day of the following month.                                                                                                                                                              |
| Specimen-pathogen combination          | Combination of priority specimens (namely, blood, urine, stool, or genital swabs) with priority pathogens according to the GLASS. The valid combinations of specimen-pathogen as per GLASS are provided in Table S1.                                                                                     |
| Pathogen-antibacterial combination     | Combination of eight priority pathogens and the relevant listed antibiotics according to the GLASS. The valid combinations of pathogen-antimicrobial as per GLASS are provided in Table S2.                                                                                                              |
| Completeness of data                   | Completeness signifies no missing variables required according to GLASS criteria: age, sex, pathogen, origin, specimen, antibiotic susceptibility results and date of specimen collection.                                                                                                               |
| Non-reporting sites                    | The surveillance sites that have not sent any AMR laboratory data to NPHL for 90 consecutive days will be defined as "non-reporting" sites.                                                                                                                                                              |
| Basic infrastructure                   | The definition of basic infrastructure is the basic facilities and equipment required by the AMR surveillance site to send the AMR reports to NPHL.                                                                                                                                                      |
| Specific requirements                  | Includes the specific requirements such as qualification of data entry person, trainings received on AMR surveillance, data management, WHONET, and Agreement with NPHL/TOR, institutional restrictions on data sharing (other than the basic infrastructure) to send the AMR reports regularly to NPHL. |

Abbreviations: AMR: Antimicrobial resistance, GLASS: Global Antimicrobial Surveillance and Use System, NPHL: National Public Health Laboratory

**Table S4.** Consistency in pathogen-antibacterial combination of AMR surveillance data according to GLASS from five AMR surveillance sites in Bagmati Province of Nepal during July-December 2022 compared to January-June 2019<sup>1</sup>

| Pathogens                       | First OR study                 |                             |                                | Second OR study             |        |  | p-value <sup>2</sup> |
|---------------------------------|--------------------------------|-----------------------------|--------------------------------|-----------------------------|--------|--|----------------------|
|                                 | January-June 2019              |                             | July-December 2022             |                             |        |  |                      |
|                                 | Total records<br>examined<br>N | Consistent records<br>n (%) | Total records<br>examined<br>N | Consistent records<br>n (%) |        |  |                      |
| <b>Overall</b>                  |                                |                             |                                |                             |        |  |                      |
| <i>Escherichia coli</i>         | 1020                           | 641 (63)                    | 2571                           | 2147 (84)                   | <0.001 |  |                      |
| <i>Klebsiella pneumoniae</i>    | 242                            | 127 (52)                    | 565                            | 435 (77)                    | <0.001 |  |                      |
| <i>Acinetobacter baumannii</i>  | 64                             | 17 (27)                     | 173                            | 173 (100)                   | <0.001 |  |                      |
| <i>Staphylococcus aureus</i>    | 168                            | 73 (43)                     | 60                             | 44 (73)                     | <0.001 |  |                      |
| <i>Streptococcus pneumoniae</i> | 1                              | 0 (0)                       | 8                              | 2 (25)                      | NA     |  |                      |
| <i>Salmonella species</i>       | 251                            | 153 (61)                    | 183                            | 179 (98)                    | <0.001 |  |                      |
| <i>Shigella species</i>         | 103                            | 12 (12)                     | 2                              | 2 (100)                     | 0.0003 |  |                      |
| <i>Neisseria gonorrhoeae</i>    | 4                              | 0 (0)                       | 5                              | 4 (80)                      | 0.0020 |  |                      |
| <b>Site A</b>                   |                                |                             |                                |                             |        |  |                      |
| <i>Escherichia coli</i>         | 354                            | 172 (49)                    | 361                            | 315 (87)                    | <0.001 |  |                      |
| <i>Klebsiella pneumoniae</i>    | 31                             | 15 (48)                     | 44                             | 38 (86)                     | 0.0004 |  |                      |
| <i>Acinetobacter baumannii</i>  | 4                              | 4 (100)                     | 0                              | 0 NA                        | NA     |  |                      |
| <i>Staphylococcus aureus</i>    | 4                              | 0 (0)                       | 2                              | 2 (100)                     | 0.01   |  |                      |
| <i>Streptococcus pneumoniae</i> | 0                              | NA NA                       | 0                              | 0 NA                        | NA     |  |                      |
| <i>Salmonella species</i>       | 34                             | 32 (94)                     | 13                             | 11 (85)                     | 0.29   |  |                      |
| <i>Shigella species</i>         | 0                              | NA NA                       | 0                              | 0 NA                        | NA     |  |                      |
| <i>Neisseria gonorrhoeae</i>    | 1                              | 0 (0)                       | 0                              | 0 NA                        | NA     |  |                      |
| <b>Site B</b>                   |                                |                             |                                |                             |        |  |                      |
| <i>Escherichia coli</i>         | 220                            | 110 (50)                    | 1134                           | 1017 (90)                   | <0.001 |  |                      |
| <i>Klebsiella pneumoniae</i>    | 67                             | 37 (55)                     | 261                            | 221 (85)                    | <0.001 |  |                      |
| <i>Acinetobacter baumannii</i>  | 15                             | 0 (0)                       | 21                             | 21 (100)                    | <0.001 |  |                      |
| <i>Staphylococcus aureus</i>    | 19                             | 19 (100)                    | 16                             | 16 (100)                    | NA     |  |                      |
| <i>Streptococcus pneumoniae</i> | 0                              | NA NA                       | 8                              | 2 (25)                      | NA     |  |                      |
| <i>Salmonella species</i>       | 56                             | 55 (98)                     | 152                            | 151 (99)                    | 0.45   |  |                      |
| <i>Shigella species</i>         | 3                              | 0 (0)                       | 1                              | 1 (100)                     | 0.045  |  |                      |
| <i>Neisseria gonorrhoeae</i>    | 1                              | 0 (0)                       | 5                              | 4 (80)                      | NA     |  |                      |
| <b>Site C</b>                   |                                |                             |                                |                             |        |  |                      |
| <i>Escherichia coli</i>         | 218                            | 199 (91)                    | 422                            | 201 (48)                    | <0.001 |  |                      |
| <i>Klebsiella pneumoniae</i>    | 94                             | 44 (47)                     | 114                            | 35 (31)                     | 0.017  |  |                      |
| <i>Acinetobacter baumannii</i>  | 44                             | 13 (30)                     | 96                             | 96 (100)                    | <0.001 |  |                      |
| <i>Staphylococcus aureus</i>    | 16                             | 16 (100)                    | 0                              | 0 NA                        | NA     |  |                      |
| <i>Streptococcus pneumoniae</i> | 0                              | NA NA                       | 0                              | 0 NA                        | NA     |  |                      |
| <i>Salmonella species</i>       | 0                              | NA NA                       | 0                              | 0 NA                        | NA     |  |                      |
| <i>Shigella species</i>         | 0                              | NA NA                       | 0                              | 0 NA                        | NA     |  |                      |
| <i>Neisseria gonorrhoeae</i>    | 0                              | NA NA                       | 0                              | 0 NA                        | NA     |  |                      |
| <b>Site D</b>                   |                                |                             |                                |                             |        |  |                      |
| <i>Escherichia coli</i>         | 109                            | 93 (85)                     | 34                             | 15 (44)                     | <0.001 |  |                      |
| <i>Klebsiella pneumoniae</i>    | 10                             | 7 (70)                      | 5                              | 5 (100)                     | 0.17   |  |                      |
| <i>Acinetobacter baumannii</i>  | 1                              | 0 (0)                       | 4                              | 4 (100)                     | NA     |  |                      |
| <i>Staphylococcus aureus</i>    | 29                             | 29 (100)                    | 8                              | 8 (100)                     | NA     |  |                      |

|                                 |     |    |      |     |     |       |        |
|---------------------------------|-----|----|------|-----|-----|-------|--------|
| <i>Streptococcus pneumoniae</i> | 1   | 0  | (0)  | 0   | 0   | NA    | NA     |
| <i>Salmonella species</i>       | 66  | 63 | (95) | 13  | 12  | (92)  | 0.63   |
| <i>Shigella species</i>         | 14  | 12 | (86) | 0   | 0   | NA    | NA     |
| <i>Neisseria gonorrhoeae</i>    | 2   | 0  | (0)  | 0   | 0   | NA    | NA     |
| <b>Site E</b>                   |     |    |      |     |     |       |        |
| <i>Escherichia coli</i>         | 119 | 67 | (56) | 116 | 114 | (98)  | <0.001 |
| <i>Klebsiella pneumoniae</i>    | 40  | 24 | (60) | 22  | 20  | (91)  | 0.01   |
| <i>Acinetobacter baumannii</i>  | 0   | NA | NA   | 0   | 0   | NA    | NA     |
| <i>Staphylococcus aureus</i>    | 100 | 9  | (9)  | 4   | 3   | (75)  | 0.001  |
| <i>Streptococcus pneumoniae</i> | 0   | 0  | NA   | 0   | 0   | NA    | NA     |
| <i>Salmonella species</i>       | 95  | 3  | (3)  | 1   | 1   | (100) | <0.001 |
| <i>Shigella species</i>         | 86  | 0  | (0)  | 1   | 1   | (100) | <0.001 |
| <i>Neisseria gonorrhoeae</i>    | 0   | NA | NA   | 0   | NA  | NA    | NA     |
| <b>Site F<sup>3</sup></b>       |     |    |      |     |     |       |        |
| <i>Escherichia coli</i>         | -   | -  | -    | 411 | 400 | (97)  | NA     |
| <i>Klebsiella pneumoniae</i>    | -   | -  | -    | 109 | 106 | (97)  | NA     |
| <i>Acinetobacter baumannii</i>  | -   | -  | -    | 47  | 47  | (100) | NA     |
| <i>Staphylococcus aureus</i>    | -   | -  | -    | 23  | 12  | (52)  | NA     |
| <i>Streptococcus pneumoniae</i> | -   | -  | -    | 0   | NA  | NA    | NA     |
| <i>Salmonella species</i>       | -   | -  | -    | 0   | NA  | NA    | NA     |
| <i>Shigella species</i>         | -   | -  | -    | 0   | NA  | NA    | NA     |
| <i>Neisseria gonorrhoeae</i>    | -   | -  | -    | 0   | NA  | NA    | NA     |
| <b>Site G<sup>3</sup></b>       |     |    |      |     |     |       |        |
| <i>Escherichia coli</i>         | -   | -  | -    | 93  | 85  | (91)  | NA     |
| <i>Klebsiella pneumoniae</i>    | -   | -  | -    | 10  | 10  | (100) | NA     |
| <i>Acinetobacter baumannii</i>  | -   | -  | -    | 5   | 5   | (100) | NA     |
| <i>Staphylococcus aureus</i>    | -   | -  | -    | 7   | 3   | (43)  | NA     |
| <i>Streptococcus pneumoniae</i> | -   | -  | -    | 0   | NA  | NA    | NA     |
| <i>Salmonella species</i>       | -   | -  | -    | 4   | 4   | (100) | NA     |
| <i>Shigella species</i>         | -   | -  | -    | 0   | NA  | NA    | NA     |
| <i>Neisseria gonorrhoeae</i>    | -   | -  | -    | 0   | NA  | NA    | NA     |

<sup>1</sup>Data for period January-June 2019 has been published and can be accessed at 10.3390/tropicalmed6020060 (last accessed on 01 Aug 2023)

<sup>2</sup>Two-proportion Z-test

<sup>3</sup>Sites F and G had not submitted any data during January-June 2019

Abbreviations: AMR: Antimicrobial resistance, GLASS: Global Antimicrobial Resistance Surveillance System, NA: Not applicable, OR: Operational Research

Pink Color denotes a decline in consistency; Green Color denotes an improvement in consistency
